# Supplementary material for: Principles, Application, and Gaps of High-Intensity Ultrasound and High-Pressure Processing to Improve Meat Texture
Source: MDPI journal article supplement (doi:10.3390/foods12030476), 2023-01-19
Supplement: s1 [file s1]

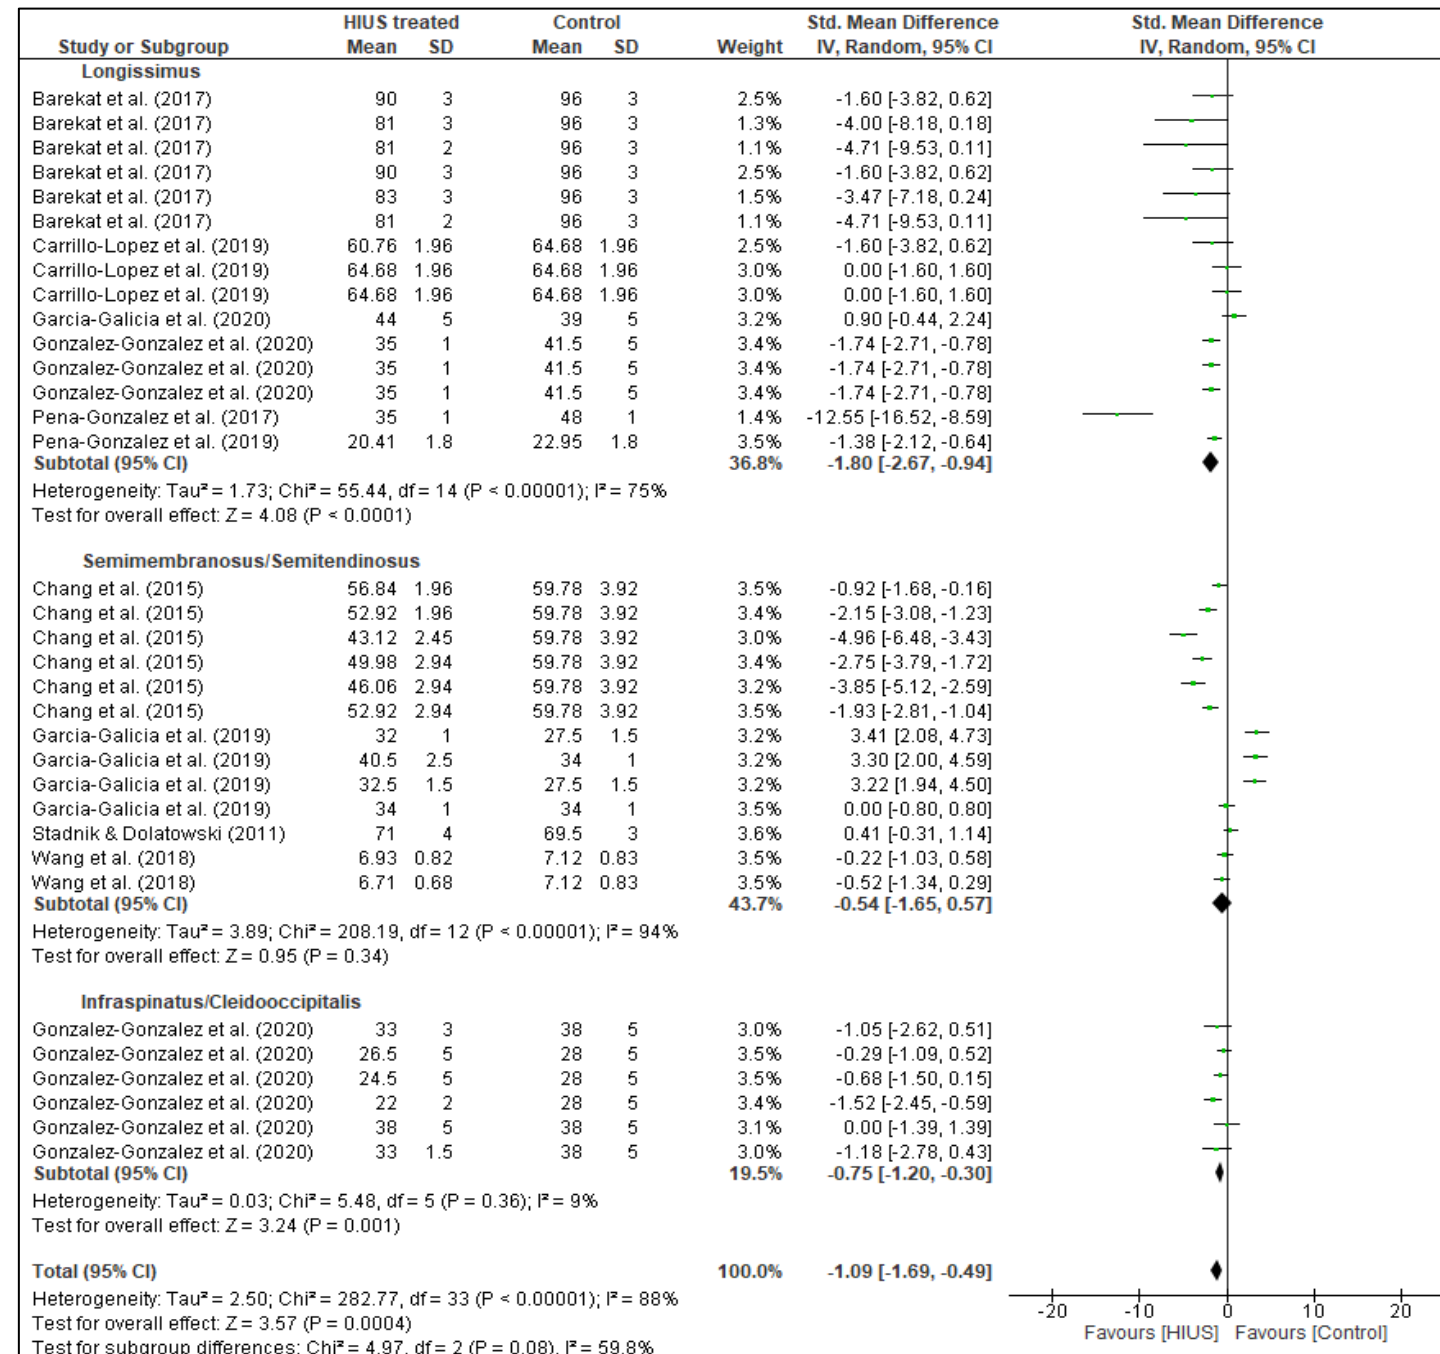

**Figure S1.** Forest plot of HIUS effect in meat tenderization considering muscle groups as subgroups.

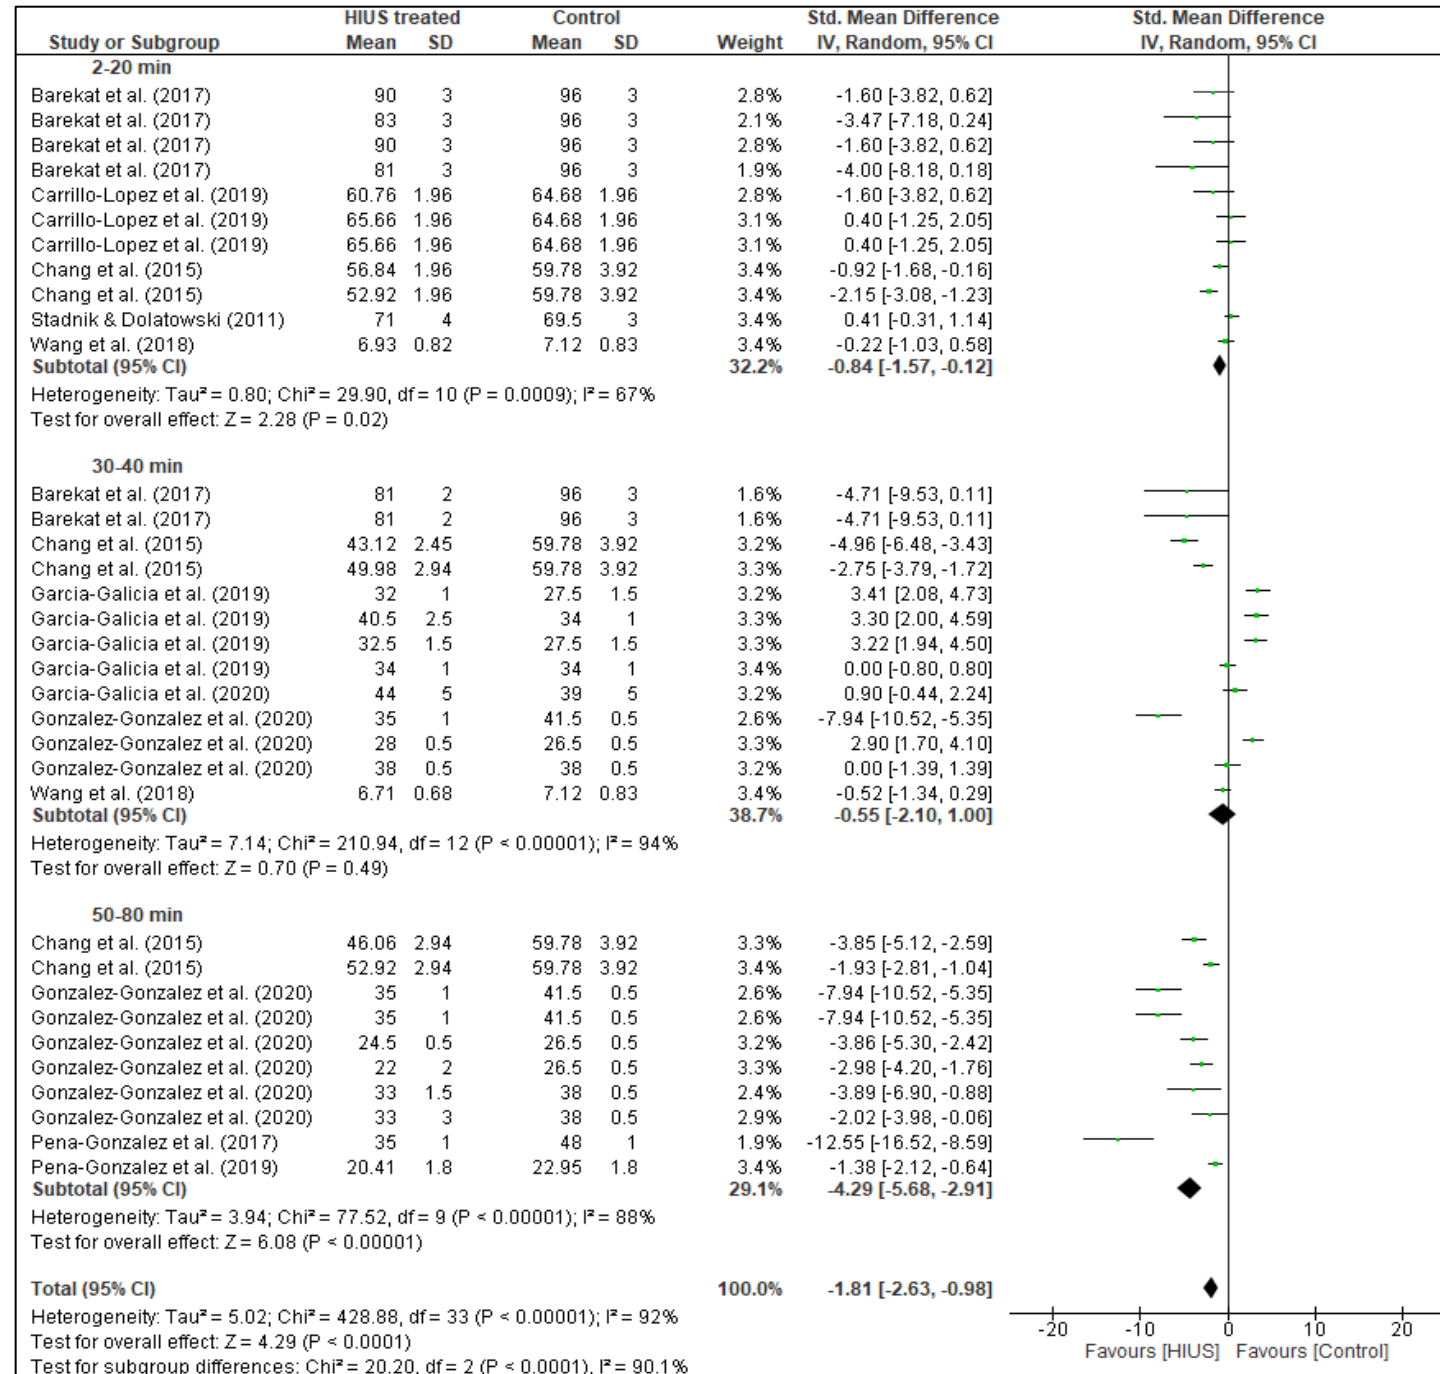

**Figure S2.** Forest plot of HIUS effect in meat tenderization considering sonication time ranges as subgroups.

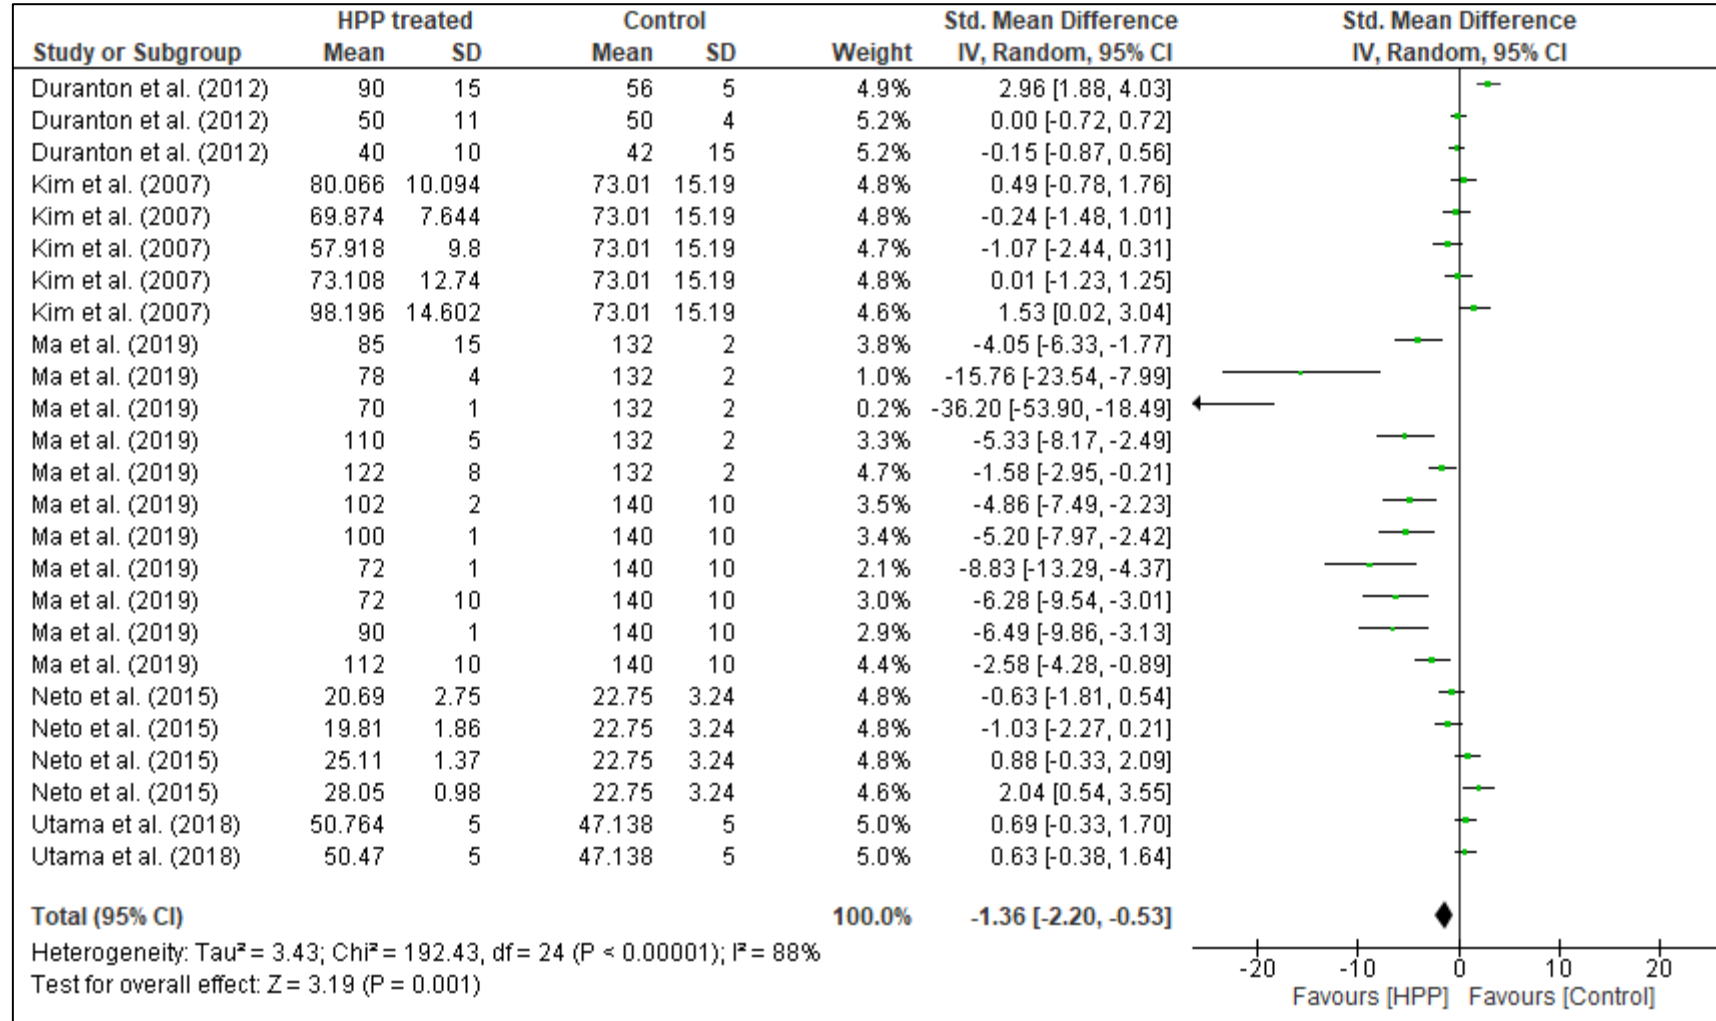

**Figure S3.** Forest plot of HPP effect in meat tenderization.

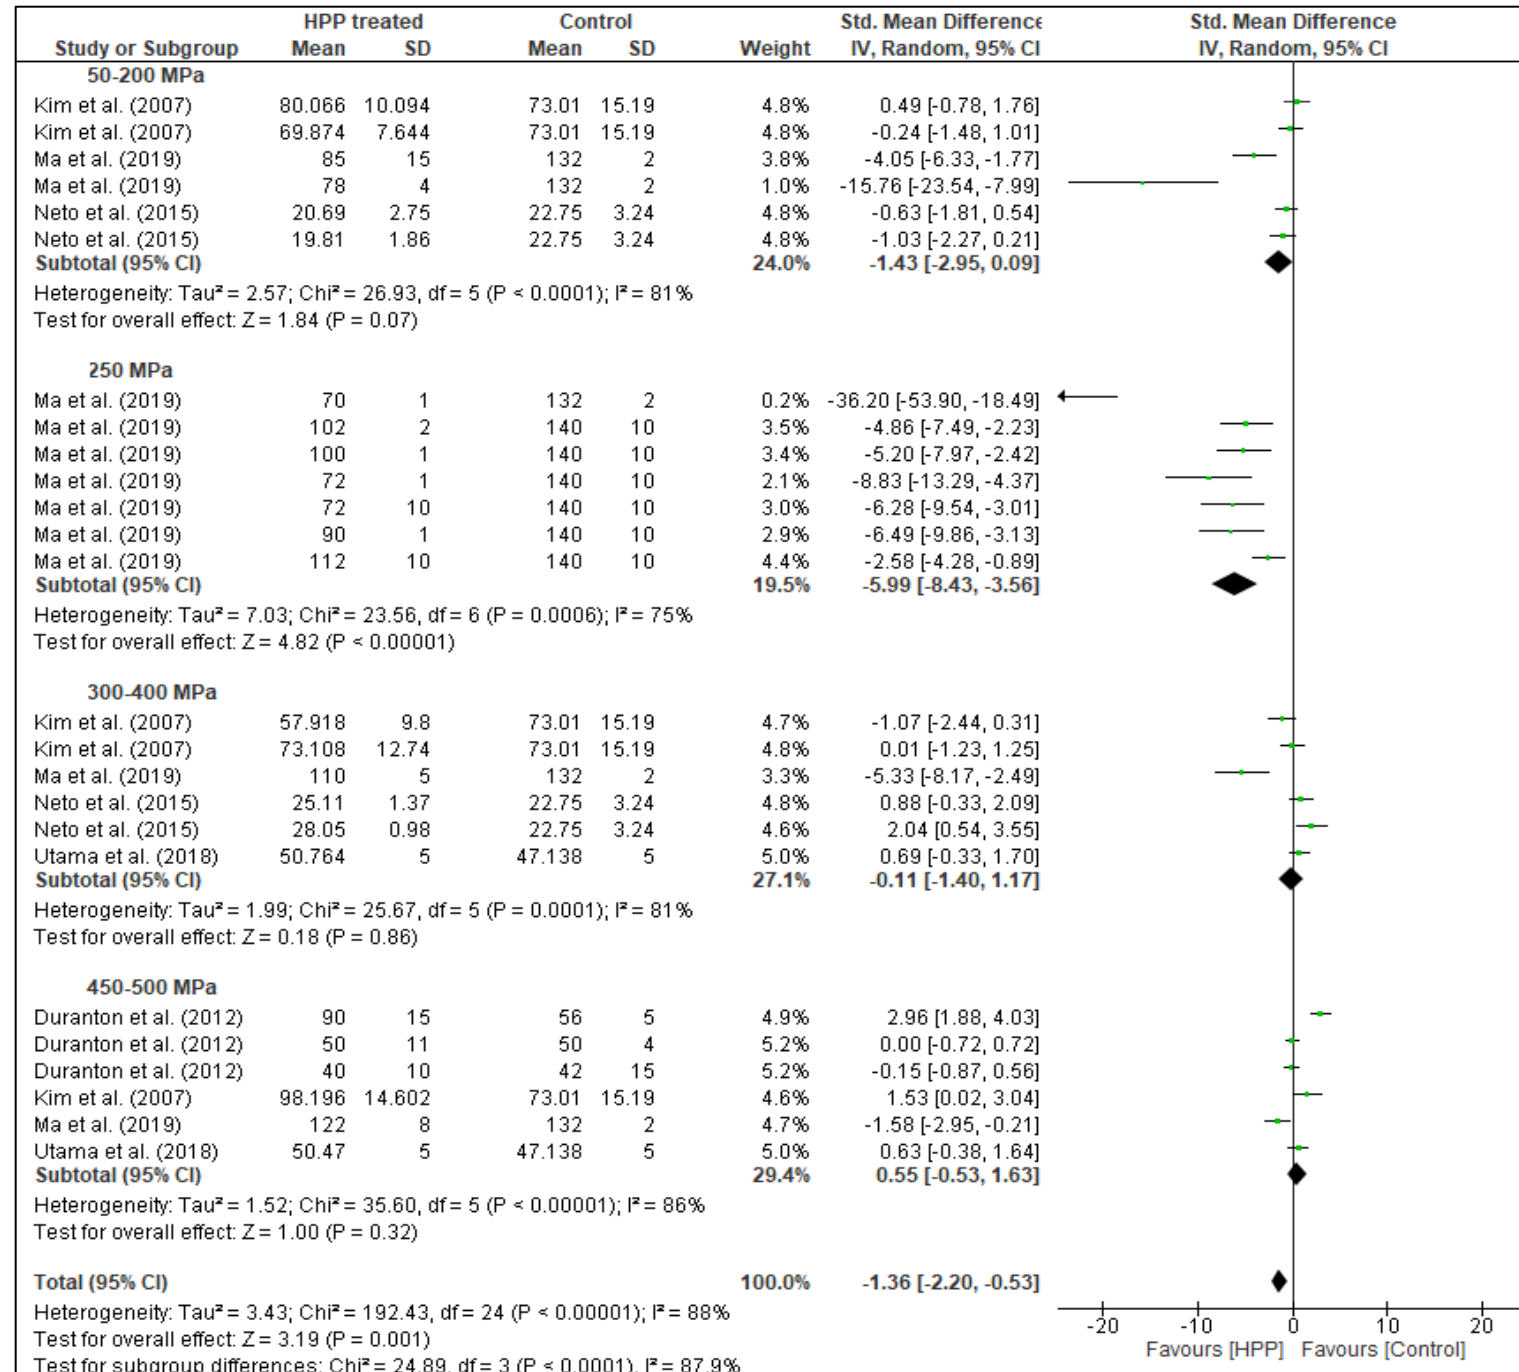

**Figure S4.** Forest plot of HPP effect in meat tenderization considering pressure ranges as subgroups.
